# Supplementary material for: Hyaluronic Acid/Collagen Nanofiber Tubular Scaffolds Support Endothelial Cell Proliferation, Phenotypic Shape and Endothelialization
Source: Nanomaterials (Basel). 2021 Sep 8;11(9):2334. doi: 10.3390/nano11092334 (PMC8471775; doi:10.3390/nano11092334)
Supplement: Supplementary file 1 [file nanomaterials-11-02334-s001.zip › nanomaterials-1296318-supplementary-proof-latest.pdf]

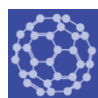

## Supplementary Materials

# Hyaluronic Acid/Collagen Nanofiber Tubular Scaffolds Support Endothelial Cell Proliferation, Phenotypic Shape and Endothelialization

Yuqing Niu <sup>1,\*</sup> and Massimiliano Galluzzi <sup>2</sup>

<sup>1</sup> Department of Pediatric Surgery, Guangdong Provincial Key Laboratory of Research in Structural Birth Defect Disease, Guangzhou Women and Children's Medical Center, Guangzhou Medical University, Guangzhou 510623, Guangdong, China

<sup>2</sup> Materials Interfaces Center, Shenzhen Institutes of Advanced Technology, Chinese Academy of Sciences, Shenzhen 518055, China; galluzzi@siat.ac.cn

\* Correspondence: niuyuqing@gwcmc.org

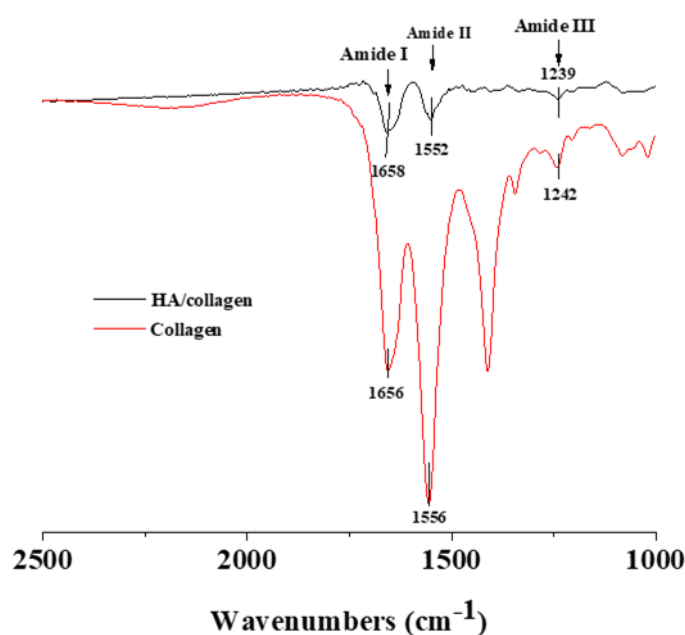

**Figure S1.** ATR-FTIR spectra collected for crosslinked collagen and HA/collagen nanofiber films.

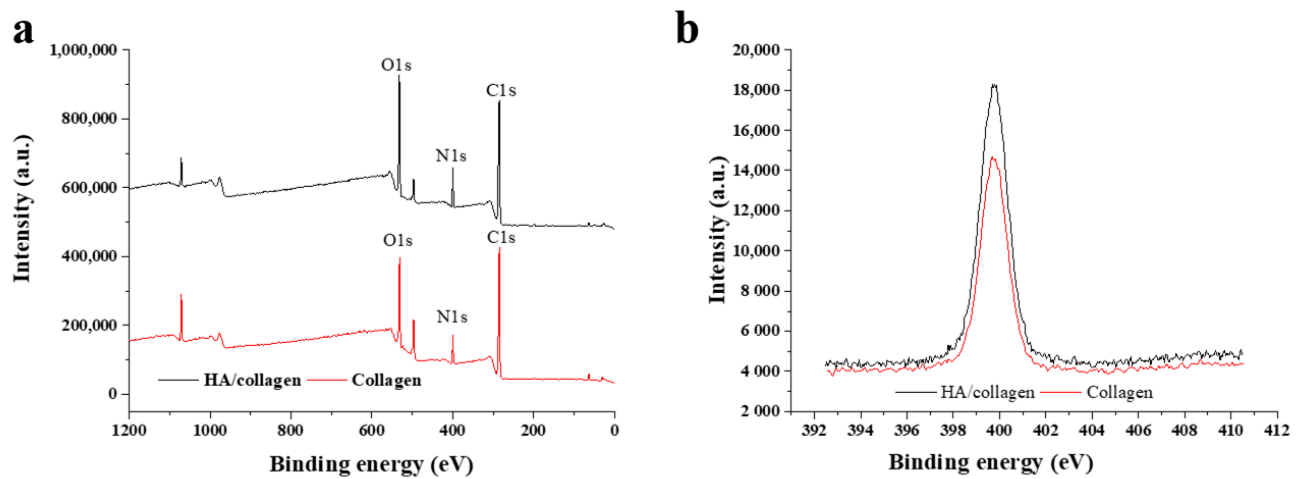

**Figure S2.** Surface chemical element distribution of collagen and HA/collagen nanofiber films after crosslinking treatment. (A) XPS spectrum of O, N, and C peaks, (B) N1s curve fitting at high-resolution.

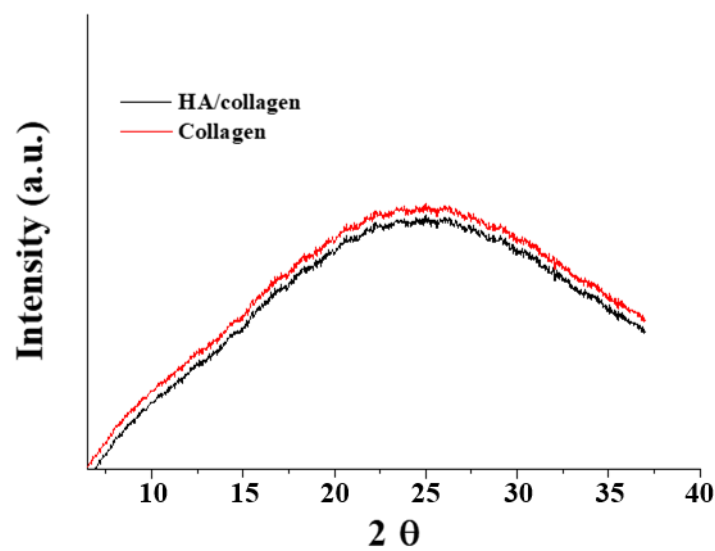

**Figure S3.** XRD pattern of collagen and HA/collagen nanofiber film surfaces after crosslinking treatment.

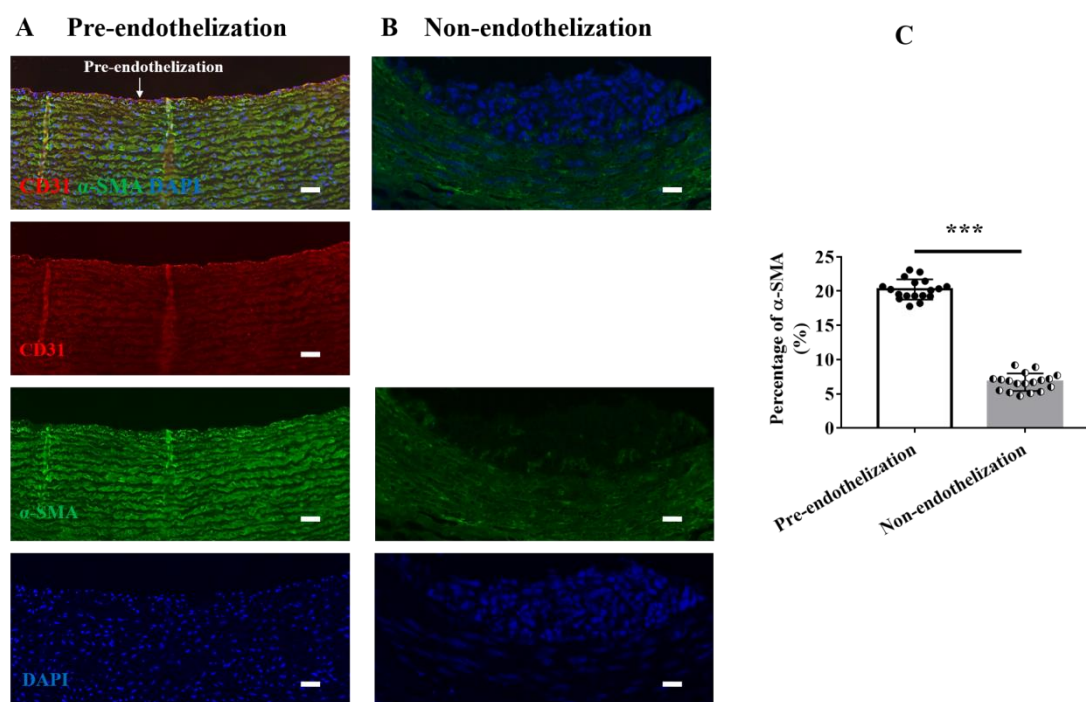

**Figure S4.** Fluorescence immunostaining of cross-section of cellularized scaffold. Representative CLSM micrographs of tubular HA/collagen scaffolds of (A) pre-endothelization and (B) non-endothelization. Scale bars: 60  $\mu$ m. (C) Statistical data of  $\alpha$ -SMA fluorescence of cellularized tubular HA/collagen scaffolds. \*\*\* $p < 0.001$ .

**Table S1.** Contact water angles and mechanical properties of HA/collagen and Collagen nanofibers.

| Sample      | $\theta_{\text{H}_2\text{O}}$ ( $^\circ$ ) <sup>a</sup> | E (MPa) <sup>b</sup> | $\delta$ (MPa) <sup>c</sup> | $\epsilon$ (%) <sup>d</sup> |
|-------------|---------------------------------------------------------|----------------------|-----------------------------|-----------------------------|
| HA/collagen | 68.7 $\pm$ 4.3                                          | 0.56 $\pm$ 0.02      | 0.93 $\pm$ 0.03             | 532.8 $\pm$ 18.6            |
| Collagen    | 85.9 $\pm$ 2.5                                          | 0.55 $\pm$ 0.03      | 0.85 $\pm$ 0.04             | 563 $\pm$ 13.6              |

<sup>a</sup>: Contact water angle.

<sup>b</sup>: Young's modulus.

<sup>c</sup>: Stress at yield.

<sup>d</sup>: Strain at break.
